# Supplementary material for: IAP-AACM v1.0： Global to regional evaluation of the atmospheric chemistry model in CAS-ESM
Source: Copernicus journal article supplement (doi:10.5194/acp-2018-1007), 2018-11-26
Supplement: Supplementary file 1 [file acp-2018-1007-supplement.pdf]

Table S1. The list of observation sites information

| Number        | Site name (ID)  | Longitude | Latitude |
|---------------|-----------------|-----------|----------|
| WDCGG Dataset |                 |           |          |
| 1             | abp312s00.noa   | -38.2     | -12.8    |
| 2             | alt482n00.ec.   | -62.5     | 82.45    |
| 3             | asc107s00.noa   | -14.4     | -7.92    |
| 4             | ask123n00.noa   | 5.63      | 23.27    |
| 5             | ask123n00.onm   | 5.63      | 23.27    |
| 6             | azr638n00.noa   | -27.4     | 38.77    |
| 7             | bal655n00.noa   | 17.22     | 55.35    |
| 8             | beo642n00.inr   | 23.59     | 42.18    |
| 9             | bhd541s00.noa   | 174.9     | -41.4    |
| 10            | bkt500s00.bmg   | 100.3     | -0.2     |
| 11            | bkt500s00.noa   | 100.3     | -0.2     |
| 12            | bme432n00.noa   | -64.7     | 32.37    |
| 13            | bmw432n00.noa   | -64.9     | 32.27    |
| 14            | brw471n00.noa - | 156.6     | 71.32    |
| 15            | bsc644n00.noa   | 28.67     | 44.17    |
| 16            | cba455n00.noa - | 162.7     | 55.2     |
| 17            | cdl453n00.ec. - | 104.7     | 53.87    |
| 18            | cfa519s00.csi   | 147.1     | -19.3    |
| 19            | cgo540s00.csi   | 144.7     | -40.7    |
| 20            | cgo540s00.noa   | 144.7     | -40.7    |
| 21            | chm449n00.ec.   | -74.3     | 49.68    |
| 22            | chr501n00.noa - | 157.2     | 1.7      |
| 23            | cmn644n00.isa   | 10.7      | 44.18    |
| 24            | cpt134s00.saw   | 18.48     | -34.4    |
| 25            | cri215n00.csi   | 73.83     | 15.08    |
| 26            | crz146s00.noa   | 51.85     | -46.5    |
| 27            | cvo116n00.uyr   | -24.9     | 16.85    |
| 28            | cya766s00.csi   | 110.5     | -66.3    |
| 29            | egb444n01.ec.   | -79.8     | 44.23    |
| 30            | eic327s00.noa - | 109.5     | -27.1    |
| 31            | esp449n00.ec. - | 126.6     | 49.38    |
| 32            | etl454n00.ec. - | 105       | 54.35    |
| 33            | fsd449n00.ec.   | -81.6     | 49.88    |
| 34            | glh636n00.uml   | 14.22     | 36.07    |
| 35            | gmi513n00.noa   | 144.8     | 13.43    |
| 36            | hba775s00.bas   | -26.5     | -75.6    |
| 37            | hba775s00.noa   | -26.5     | -75.6    |
| 38            | hpb647n00.dwd   | 11.02     | 47.8     |
| 39            | hpb647n00.noa   | 11.02     | 47.8     |
| 40            | hun646n00.noa   | 16.65     | 46.95    |

| Number | Site name (ID)  | Longitude | Latitude |
|--------|-----------------|-----------|----------|
| 41     | ice663n00.noa   | -20.3     | 63.4     |
| 42     | izo128n00.aem   | -16.5     | 28.3     |
| 43     | jfj646n00.emp   | 7.99      | 46.55    |
| 44     | key425n00.noa   | -80.2     | 25.67    |
| 45     | kmw653n00.riv   | 6.28      | 53.33    |
| 46     | kos649n00.chm   | 15.08     | 49.58    |
| 47     | kum519n00.noa - | 154.8     | 19.52    |
| 48     | kvv646n00.ars   | 14.53     | 46.3     |
| 49     | kzd244n00.noa   | 75.57     | 44.45    |
| 50     | kzm243n00.noa   | 77.87     | 43.25    |
| 51     | lef445n00.noa   | -90.3     | 45.92    |
| 52     | llb454n00.noa - | 112.5     | 54.95    |
| 53     | llb454n01.ec. - | 112.5     | 54.95    |
| 54     | lln223n00.noa   | 120.9     | 23.47    |
| 55     | lmp635n00.noa   | 12.63     | 35.52    |
| 56     | maa767s00.csi   | 62.87     | -67.6    |
| 57     | mex419n00.noa   | -97.2     | 19.98    |
| 58     | mhd653n00.aga   | -9.9      | 53.33    |
| 59     | mhd653n00.noa   | -9.9      | 53.33    |
| 60     | mid528n00.noa - | 177.4     | 28.2     |
| 61     | mkn100s00.noa   | 37.3      | -0.06    |
| 62     | mlo519n00.csi - | 155.6     | 19.54    |
| 63     | mnm224n00.jma   | 154       | 24.28    |
| 64     | mqa554s00.csi   | 159       | -54.5    |
| 65     | nat306s00.noa   | -35.2     | -6       |
| 66     | ngl653n00.uba   | 13.03     | 53.17    |
| 67     | nmb123s00.noa   | 15.02     | -23.6    |
| 68     | nwr440n01.noa - | 105.6     | 40.05    |
| 69     | oxk650n00.noa   | 11.8      | 50.03    |
| 70     | pal667n00.noa   | 24.12     | 67.97    |
| 71     | pay646n00.emp   | 6.95      | 46.82    |
| 72     | pdi221n00.nhm   | 103.5     | 21.57    |
| 73     | pdm642n00.la.   | 0.14      | 42.94    |
| 74     | poc900n00.noa - | 155       | 0        |
| 75     | poc905n00.noa - | 151       | 5        |
| 76     | poc905s00.noa - | 159       | -5       |
| 77     | poc910n00.noa - | 149       | 10       |
| 78     | poc910s00.noa - | 161       | -10      |
| 79     | poc915n00.noa - | 145       | 15       |
| 80     | poc915s00.noa - | 171       | -15      |
| 81     | poc920n00.noa - | 141       | 20       |
| 82     | poc920s00.noa - | 174       | -20      |
| 83     | poc925n00.noa - | 139       | 25       |

| Number | Site name (ID)  | Longitude | Latitude |
|--------|-----------------|-----------|----------|
| 84     | poc925s00.noa - | 171       | -25      |
| 85     | poc930n00.noa - | 135       | 30       |
| 86     | poc930s00.noa - | 176       | -30      |
| 87     | psa764s00.noa   | -64       | -64.9    |
| 88     | pta438n00.noa - | 123.7     | 38.95    |
| 89     | puy645n00.lam   | 2.97      | 45.77    |
| 90     | rig646n00.emp   | 8.45      | 46.07    |
| 91     | rpb413n00.noa   | -59.4     | 13.17    |
| 92     | ryo239n00.jma   | 141.8     | 39.03    |
| 93     | sey104s00.noa   | 55.17     | -4.67    |
| 94     | sgp436n00.noa   | -97.5     | 36.78    |
| 95     | shm452n00.noa   | 174.1     | 52.72    |
| 96     | smo514s00.noa - | 170.6     | -14.2    |
| 97     | snb647n00.uba   | 12.95     | 47.05    |
| 98     | spo789s00.csi   | -24.8     | -89.4    |
| 99     | ssl647n00.uba   | 7.92      | 47.92    |
| 100    | stm666n00.noa   | 2         | 66       |
| 101    | sum672n00.noa   | -38.5     | 72.58    |
| 102    | syo769s00.noa   | 39.58     | -69      |
| 103    | tap236n00.noa   | 126.1     | 36.72    |
| 104    | tdf354s00.noa   | -68.5     | -54.9    |
| 105    | thd441n00.noa - | 124.2     | 41.05    |
| 106    | tll330s00.dmc   | -70.8     | -30.2    |
| 107    | ush354s00.noa   | -68.3     | -54.9    |
| 108    | uta439n00.noa - | 113.7     | 39.88    |
| 109    | uum244n00.noa   | 111.1     | 44.45    |
| 110    | wis631n00.noa   | 34.87     | 31.12    |
| 111    | wlg236n00.cma   | 100.9     | 36.28    |
| 112    | wsa443n00.ec.   | -60       | 43.93    |
| 113    | yon224n00.jma   | 123       | 24.47    |
| 114    | zep678n00.noa   | 11.88     | 78.9     |
| 115    | zsf647n00.uba   | 10.98     | 47.42    |
| 116    | aht662n00.fmi   | 24.2      | 62.58    |
| 117    | bur642n00.nim   | 27.48     | 42.48    |
| 118    | dig654n00.ioe   | 22.07     | 54.15    |
| 119    | irb645n00.ars   | 14.87     | 45.57    |
| 120    | kam643n00.rhm   | 21.95     | 43.4     |
| 121    | kps646n00.hms   | 19.55     | 46.97    |
| 122    | oul666n00.fmi   | 29.4      | 66.32    |
| 123    | pld642n00.nim   | 24.75     | 42.13    |
| 124    | plv643n00.nim   | 24.6      | 43.42    |
| 125    | rcv656n00.lhm   | 21.17     | 56.16    |
| 126    | sof642n00.nim   | 23.38     | 42.65    |

| Number | Site name (ID) | Longitude | Latitude |
|--------|----------------|-----------|----------|
| 127    | uto659n00.fmi  | 21.38     | 59.78    |
| 128    | vir660n00.fmi  | 27.67     | 60.53    |
| 129    | vrn643n00.nim  | 27.92     | 43.2     |
| 130    | zsn657n00.lhm  | 25.54     | 57.08    |
| 131    | alt482n00.aqr  | -62.5     | 82.45    |
| 132    | amy236n00.kma  | 126.3     | 36.53    |
| 133    | arh777s00.noa  | 166.7     | -77.8    |
| 134    | bhd541s00.niw  | 174.9     | -41.4    |
| 135    | bra450n00.aqr  | -105      | 50.2     |
| 136    | brw471n00.noa  | -157      | 71.32    |
| 137    | cai130n00.ema  | 31.28     | 30.08    |
| 138    | cps449n00.aqr  | -75       | 49.82    |
| 139    | dbl656n00.lhm  | 23.19     | 56.37    |
| 140    | dcc775s00.isa  | 123.3     | -75.1    |
| 141    | dmv504n00.mmd  | 117.8     | 4.97     |
| 142    | egb444n00.aqr  | -79.8     | 44.23    |
| 143    | ela449n00.aqr  | -93.7     | 49.67    |
| 144    | est451n00.aqr  | -110      | 51.67    |
| 145    | isk242n00.ksn  | 76.98     | 42.62    |
| 146    | kej444n00.aqr  | -65.2     | 44.43    |
| 147    | kvk646n00.ars  | 15.1      | 46.12    |
| 148    | lau545s00.noa  | 169.7     | -45      |
| 149    | lgb652n00.uba  | 10.77     | 52.8     |
| 150    | mbi764s00.smn  | -56.6     | -64.2    |
| 151    | mhd653n00.nui  | -9.9      | 53.33    |
| 152    | mlo519n00.noa  | -156      | 19.54    |
| 153    | nmy770s00.awi  | -8.25     | -70.7    |
| 154    | nwr440n00.noa  | -106      | 40.04    |
| 155    | pal667n00.fmi  | 24.12     | 67.97    |
| 156    | prs645n00.rse  | 7.7       | 45.93    |
| 157    | pyr227n00.isa  | 86.81     | 27.96    |
| 158    | sat448n00.aqr  | -123      | 48.78    |
| 159    | smo514s00.noa  | -171      | -14.2    |
| 160    | spo789s00.noa  | -24.8     | -89.4    |
| 161    | syo769s00.jma  | 39.58     | -69      |
| 162    | thd441n00.noa  | -124      | 41.05    |
| 163    | tkb236n10.jma  | 140.1     | 36.05    |
| 164    | ush354s00.smn  | -68.3     | -54.9    |
| 165    | vdl664n00.ivl  | 19.77     | 64.25    |
| 166    | wes654n00.uba  | 8.32      | 54.93    |
| 167    | wkt431n00.noa  | -97.3     | 31.32    |
| 168    | zgt654n00.uba  | 12.73     | 54.43    |
| 169    | zrn646n00.ars  | 15        | 46.43    |

| Number | Site name (ID)   | Longitude | Latitude |
|--------|------------------|-----------|----------|
| EANET  |                  |           |          |
| num    | staid            | lon       | lat      |
| 1      | PhnomPenh        | 104.83    | 11.55    |
| 2      | Jakarta          | 106.83    | -6.18    |
| 3      | Serpong          | 106.57    | 6.25     |
| 4      | Bandung          | 107.58    | 6.9      |
| 5      | Rishiri          | 141.2     | 45.12    |
| 6      | Ochishi          | 145.5     | 43.15    |
| 7      | Tappi            | 140.35    | 41.25    |
| 8      | Sado-seki        | 138.4     | 38.23    |
| 9      | Ijira            | 136.68    | 35.57    |
| 10     | Oki              | 133.18    | 36.28    |
| 11     | Banryu           | 131.8     | 34.68    |
| 12     | Hedo             | 128.25    | 26.87    |
| 13     | Ogasawara        | 142.22    | 27.08    |
| 14     | PetalingJaya     | 101.65    | 3.1      |
| 15     | DanumValley      | 117.85    | 4.98     |
| 16     | Yangon           | 96.12     | 16.5     |
| 17     | Kanghwa          | 126.28    | 37.7     |
| 18     | Cheju            | 126.17    | 33.3     |
| 19     | Imsil            | 127.18    | 35.6     |
| 20     | Listvyanka       | 104.9     | 51.85    |
| 21     | Irkutsk          | 104.25    | 52.23    |
| 22     | Primorskaya      | 132.12    | 43.7     |
| 23     | Bangkok          | 100.53    | 13.77    |
| 24     | Khanchanaburi    | 98.58     | 14.77    |
| 25     | ChiangMai        | 98.93     | 18.77    |
| 26     | NakhonRatchasima | 101.88    | 14.45    |
| 27     | Hanoi            | 105.85    | 21.02    |
| 28     | HoaBinh          | 105.33    | 20.82    |
| 29     | Tokyo            | 139.75    | 35.68    |
| 30     | NakhonRatchasima | 101.88    | 14.45    |
| 31     | Mt.Sto.Tomas 1   | 120.6     | 6.42     |
| 32     | Hongwen          | 118.13    | 24.47    |
| 33     | XiangZhou        | 113.57    | 22.27    |
| 34     | Kototabang       | 100.32    | 0.2      |
| 35     | Ulaanbaatar      | 106.82    | 47.9     |
| 36     | Samutprakarn     | 100.57    | 13.73    |
| 37     | Mondy            | 101       | 51.67    |
| 38     | Happo            | 137.8     | 36.7     |
| 39     | MtStoTomas       | 120.6     | 16.42    |
| 40     | Khanchanaburi    | 98.58     | 14.77    |
| EMEP   |                  |           |          |

| Number | Site name (ID) | Longitude | Latitude |
|--------|----------------|-----------|----------|
| 1      | Waldhof        | 10.76     | 52.8     |
| 2      | Schauinsland   | 7.91      | 47.91    |
| 3      | Neuglobsow     | 13.03     | 53.17    |
| 4      | Lahemaa        | 25.9      | 59.5     |
| 5      | Uto            | 21.38     | 59.78    |
| 6      | Virolahti      | 27.69     | 60.53    |
| 7      | Pallas         | 24.24     | 68       |
| 8      | K-puszt        | 19.58     | 46.97    |
| 9      | Oak            | -6.92     | 52.87    |
| 10     | Malin          | -7.34     | 55.38    |
| 11     | Carnsore       | -6.36     | 52.18    |
| 12     | Rucava         | 21.17     | 56.16    |
| 13     | Birkenes       | 8.25      | 58.39    |
| 14     | Karvatn        | 8.88      | 62.78    |
| 15     | Zeppelin       | 11.89     | 78.91    |
| 16     | Hurdal         | 11.08     | 60.37    |
| 17     | Jarczew        | 21.97     | 51.81    |
| 18     | Sniezka        | 15.74     | 50.74    |
| 19     | Leba           | 17.53     | 54.75    |
| 20     | Diabla         | 22.07     | 54.15    |
| 21     | Danki          | 37.8      | 54.9     |
| 22     | Iskrba         | 14.87     | 45.57    |
| 23     | Starina        | 22.27     | 49.05    |
| 24     | Melpitz_1      | 12.93     | 51.53    |
| 25     | Ispra          | 8.63      | 45.8     |
| 26     | Cabauw         | 4.92      | 51.97    |
| 27     | Illmitz        | 16.77     | 47.77    |
| 28     | Vorhegg        | 12.97     | 46.68    |
| 29     | Zoebelboden    | 14.44     | 47.84    |
| 30     | Payerne        | 6.94      | 46.81    |
| 31     | Tanikon        | 8.9       | 47.48    |
| 32     | Chaumont       | 6.98      | 47.05    |
| 33     | Rigi           | 8.46      | 47.07    |
| 34     | Churanov       | 13.6      | 49.07    |
| 35     | Westerland     | 8.31      | 54.93    |
| 36     | Zingst         | 12.73     | 54.43    |
| 37     | Harwell        | -1.32     | 51.57    |
| 38     | Auchencorth    | -3.24     | 55.79    |
| 39     | Kamenicki      | 21.95     | 43.4     |
| 40     | Schmucke       | 10.77     | 50.65    |
| 41     | San            | -4.35     | 39.55    |
| 42     | Cabo           | 3.32      | 42.32    |
| 43     | Zarra          | -1.1      | 39.09    |

| Number  | Site name (ID) | Longitude | Latitude |
|---------|----------------|-----------|----------|
| 44      | Penausende     | -5.87     | 41.28    |
| 45      | Els            | 0.72      | 41.4     |
| 46      | Rao            | 11.91     | 57.39    |
| IMPROVE |                |           |          |
| 1       | ACAD1          | -68.261   | 44.377   |
| 2       | BLMO1          | -96.191   | 43.716   |
| 3       | BRMA1          | -70.729   | 44.107   |
| 4       | CEBL1          | -99.763   | 38.77    |
| 5       | DENA1          | -148.968  | 63.723   |
| 6       | EVER1          | -80.681   | 25.391   |
| 7       | GAAR1          | -151.517  | 66.903   |
| 8       | GRR11          | -91.405   | 43.937   |
| 9       | HEGL1          | -92.922   | 36.614   |
| 10      | KALM1          | -124.059  | 42.552   |
| 11      | LOST1          | -102.402  | 48.642   |
| 12      | MING1          | -90.143   | 36.972   |
| 13      | NEBR1          | -100.339  | 41.889   |
| 14      | OWVL1          | -118.331  | 37.361   |
| 15      | PMRF1          | -72.869   | 44.528   |
| 16      | RAFA1          | -120.007  | 34.734   |
| 17      | SAGO1          | -116.913  | 34.194   |
| 18      | SENE1          | -85.95    | 46.289   |
| 19      | SIME1          | -160.506  | 55.325   |
| 20      | TALL1          | -96.56    | 38.434   |
| 21      | TRIN1          | -122.805  | 40.786   |
| 22      | WHIT1          | -105.535  | 33.469   |
| 23      | ZICA1          | -113.151  | 37.198   |
| EPA     |                |           |          |
| 1       | 10730023       | -86.82    | 33.55    |
| 2       | 40128000       | -113.56   | 34.24    |
| 3       | 60530002       | -121.64   | 36.7     |
| 4       | 60831008       | -120.05   | 34.49    |
| 5       | 90090027       | -72.9     | 41.3     |
| 6       | 120573002      | -82.54    | 27.89    |
| 7       | 120860033      | -80.16    | 25.73    |
| 8       | 170310022      | -87.64    | 41.88    |
| 9       | 171190024      | -90.16    | 38.61    |
| 10      | 180570007      | -85.77    | 39.29    |
| 11      | 191770006      | -92.01    | 40.7     |
| 12      | 201330003      | -95.48    | 37.68    |
| 13      | 360610079      | -73.9     | 40.82    |
| 14      | 380171004      | -96.86    | 46.93    |
| 15      | 380250003      | -102.53   | 47.31    |

---

|    |           |         |       |
|----|-----------|---------|-------|
| 16 | 410510080 | -122.6  | 45.5  |
| 17 | 420010001 | -77.31  | 39.92 |
| 18 | 420031008 | -79.73  | 40.61 |
| 19 | 450450015 | -82.41  | 34.84 |
| 20 | 460990006 | -96.7   | 43.55 |
| 21 | 461030020 | -103.27 | 44.09 |
| 22 | 461270001 | -96.71  | 42.75 |
| 23 | 550870009 | -88.81  | 45.56 |
| 24 | 560030003 | -108.39 | 44.84 |
| 25 | 20200018  | -149.82 | 61.21 |
| 26 | 21100004  | -134.57 | 58.39 |
| 27 | 21221006  | -151.69 | 59.46 |
| 28 | 21700008  | -149.03 | 61.53 |
| 29 | 40131003  | -111.87 | 33.41 |
| 30 | 40133010  | -112.12 | 33.46 |
| 31 | 40278011  | -114.61 | 32.69 |
| 32 | 51190007  | -92.28  | 34.76 |
| 33 | 60070008  | -121.84 | 39.76 |
| 34 | 60090001  | -120.68 | 38.2  |
| 35 | 60510005  | -119.12 | 37.96 |
| 36 | 60970001  | -123.02 | 38.8  |
| 37 | 60990005  | -120.99 | 37.64 |
| 38 | 120570083 | -82.38  | 27.86 |
| 39 | 150030010 | -158.09 | 21.32 |
| 40 | 300290009 | -114.34 | 48.4  |
| 41 | 300710010 | -107.86 | 48.32 |
| 42 | 410390059 | -123.14 | 44.07 |
| 43 | 420030003 | -79.77  | 40.45 |
| 44 | 530330080 | -122.31 | 47.57 |
| 45 | 530630021 | -117.36 | 47.67 |
| 46 | 560350100 | -110.06 | 42.79 |
| 47 | 560370007 | -109.22 | 41.59 |
| 48 | 560370300 | -109.79 | 41.75 |
| 49 | 560370866 | -109.79 | 41.63 |
| 50 | 560370867 | -108.67 | 41.75 |
| 51 | 10030010  | -87.88  | 30.5  |
| 52 | 21220008  | -151.07 | 60.49 |
| 53 | 40011235  | -109.44 | 35.88 |
| 54 | 50010011  | -91.56  | 34.52 |
| 55 | 60010007  | -121.78 | 37.69 |
| 56 | 60410001  | -122.52 | 37.97 |
| 57 | 60670006  | -121.37 | 38.61 |
| 58 | 60710306  | -117.33 | 34.51 |
| 59 | 60730003  | -116.94 | 32.79 |

---



|    |           |         |       |
|----|-----------|---------|-------|
| 60 | 60731006  | -116.77 | 32.84 |
| 61 | 60750005  | -122.4  | 37.77 |
| 62 | 60771002  | -121.27 | 37.95 |
| 63 | 61111004  | -119.23 | 34.45 |
| 64 | 100010002 | -75.56  | 38.99 |
| 65 | 131210039 | -84.44  | 33.8  |
| 66 | 131350002 | -84.07  | 33.96 |
| 67 | 150011006 | -155.11 | 19.72 |
| 68 | 160410001 | -111.81 | 42.01 |
| 69 | 330115001 | -71.88  | 42.86 |
| 70 | 380070002 | -103.38 | 46.89 |
| 71 | 471570047 | -90.02  | 35.17 |
| 72 | 550090005 | -87.99  | 44.51 |
| 73 | 560290001 | -109.07 | 44.53 |
| 74 | 20900034  | -147.73 | 64.85 |
| 75 | 40070009  | -110.86 | 33.4  |
| 76 | 60010011  | -122.28 | 37.81 |
| 77 | 80013001  | -104.95 | 39.84 |
| 78 | 90010012  | -73.16  | 41.2  |
| 79 | 120110010 | -80.17  | 26.13 |
| 80 | 120170006 | -82.64  | 28.96 |
| 81 | 160050004 | -112.52 | 42.92 |
| 82 | 170191001 | -88.37  | 40.05 |
| 83 | 220150008 | -93.75  | 32.54 |
| 84 | 230090103 | -68.26  | 44.38 |
| 85 | 230112005 | -69.79  | 44.23 |
| 86 | 230310009 | -70.77  | 43.11 |
| 87 | 240053001 | -76.47  | 39.31 |
| 88 | 271095008 | -92.45  | 44    |
| 89 | 300490004 | -111.99 | 46.85 |
| 90 | 390350038 | -81.68  | 41.48 |
| 91 | 390810017 | -80.62  | 40.37 |
| 92 | 390850003 | -81.42  | 41.67 |
| 93 | 401430235 | -96     | 36.13 |

CAWNET

|   |              |       |      |
|---|--------------|-------|------|
| 1 | Chengdu      | 104.3 | 30.6 |
| 2 | Dalian       | 121.6 | 38.9 |
| 3 | Dunhuang     | 94.67 | 40.1 |
| 4 | Gaolanshan   | 105.8 | 36   |
| 5 | Gucheng      | 115.8 | 39.1 |
| 6 | Jinsha       | 114.2 | 29.6 |
| 7 | LinAn        | 119.7 | 30.3 |
| 8 | Longfengshan | 127.5 | 44.7 |
| 9 | Shangdianzi  | 117.1 | 40.7 |

|       |             |        |       |
|-------|-------------|--------|-------|
| 10    | Taiyangshan | 111.7  | 29.2  |
| 11    | Xian        | 109    | 34.5  |
| 12    | Zhenbeitai  | 109.2  | 38.5  |
| 13    | Zhengzhou   | 113.7  | 34.8  |
| CNEMC |             |        |       |
| 1     | 11000041    | 116.17 | 40.29 |
| 2     | 110000244   | 116.43 | 39.95 |
| 3     | 110000245   | 116.43 | 39.87 |
| 4     | 110000246   | 116.4  | 39.98 |
| 5     | 110000247   | 116.47 | 39.97 |
| 6     | 110000249   | 116.22 | 39.93 |
| 7     | 110000250   | 116.36 | 39.94 |
| 8     | 110000251   | 116.32 | 39.99 |
| 9     | 110000252   | 116.37 | 39.87 |
| 10    | 110000253   | 116.72 | 40.14 |
| 11    | 110000254   | 116.64 | 40.39 |
| 12    | 110000255   | 116.23 | 40.2  |
| 13    | 440100051   | 113.24 | 23.14 |
| 14    | 440100057   | 113.26 | 23.13 |
| 15    | 440100063   | 113.28 | 23.16 |
| 16    | 440100064   | 113.26 | 23.1  |
| 17    | 440100073   | 113.32 | 23.14 |
| 18    | 440100088   | 113.35 | 23.09 |
| 19    | 440100089   | 113.43 | 23.1  |
| 20    | 440100090   | 113.35 | 22.95 |
| 21    | 440100091   | 113.21 | 23.39 |
| 22    | 440100092   | 113.57 | 23.28 |
| 23    | 442000051   | 113.38 | 22.52 |
| 24    | 442000052   | 113.39 | 22.55 |
| 25    | 442000053   | 113.41 | 22.51 |
| 26    | 131000402   | 116.68 | 39.52 |
| 27    | 131000403   | 116.77 | 39.57 |
| 28    | 131000407   | 116.71 | 39.56 |
| 29    | 131000408   | 116.75 | 39.53 |
| 30    | 410100051   | 113.64 | 34.75 |
| 31    | 410100052   | 113.6  | 34.75 |
| 32    | 410100053   | 113.68 | 34.75 |
| 33    | 410100054   | 113.64 | 34.77 |
| 34    | 410100062   | 113.68 | 34.8  |
| 35    | 410100063   | 113.56 | 34.8  |
| 36    | 410100064   | 113.73 | 34.72 |
| 37    | 410100065   | 113.73 | 34.72 |
| 38    | 420100051   | 114.28 | 30.62 |
| 39    | 420100052   | 114.15 | 30.48 |

---

|    |           |        |       |
|----|-----------|--------|-------|
| 40 | 420100053 | 114.25 | 30.55 |
| 41 | 420100054 | 114.3  | 30.55 |
| 42 | 420100055 | 114.37 | 30.57 |
| 43 | 420100056 | 114.43 | 30.61 |
| 44 | 420100057 | 114.3  | 30.59 |
| 45 | 420100075 | 114.39 | 30.48 |
| 46 | 420100076 | 114.21 | 30.64 |
| 47 | 320600073 | 120.86 | 32    |
| 48 | 320600074 | 120.87 | 32.02 |
| 49 | 320600077 | 120.94 | 31.93 |
| 50 | 320600078 | 120.81 | 32.04 |
| 51 | 320900401 | 120.12 | 33.4  |
| 52 | 320900402 | 120.16 | 33.39 |
| 53 | 320900403 | 120.13 | 33.37 |
| 54 | 320900406 | 120.22 | 33.39 |
| 55 | 310000051 | 121.4  | 31.24 |
| 56 | 310000052 | 121.54 | 31.27 |
| 57 | 310000053 | 121.48 | 31.2  |
| 58 | 310000055 | 121.47 | 31.3  |
| 59 | 310000056 | 121.43 | 31.23 |
| 60 | 310000057 | 121.41 | 31.17 |
| 61 | 310000058 | 121.53 | 31.23 |
| 62 | 310000059 | 121.58 | 31.21 |
| 63 | 310000251 | 121.7  | 31.19 |
| 64 | 510100051 | 104.05 | 30.66 |
| 65 | 510100052 | 104.03 | 30.65 |
| 66 | 510100054 | 104.12 | 30.64 |
| 67 | 510100064 | 104.07 | 30.68 |
| 68 | 510100073 | 104.08 | 30.57 |
| 69 | 510100074 | 104.18 | 30.69 |
| 70 | 510100075 | 103.97 | 30.71 |
| 71 | 120000051 | 117.15 | 39.1  |
| 72 | 120000062 | 117.14 | 39.17 |
| 73 | 120000072 | 117.18 | 39.12 |
| 74 | 120000081 | 117.19 | 39.17 |
| 75 | 120000095 | 117.24 | 39.11 |
| 76 | 120000100 | 117.27 | 39.13 |
| 77 | 120000104 | 117.2  | 39.09 |
| 78 | 120000137 | 117.46 | 38.84 |
| 79 | 120000143 | 117.71 | 39.03 |
| 80 | 120000168 | 117.31 | 39.09 |
| 81 | 120000186 | 117.18 | 39.23 |
| 82 | 120000301 | 117.4  | 39.12 |
| 83 | 120000302 | 117.76 | 39.16 |

---

|                        |           |         |        |
|------------------------|-----------|---------|--------|
| 84                     | 650100051 | 87.6    | 43.77  |
| 85                     | 650100055 | 87.58   | 43.83  |
| 86                     | 650100056 | 87.55   | 43.87  |
| 87                     | 650100071 | 87.64   | 43.83  |
| 88                     | 650100072 | 87.42   | 43.87  |
| 89                     | 650100091 | 87.64   | 43.96  |
| Aerosol sites in China |           |         |        |
| 1                      | Beijing   | 116.371 | 39.974 |
| 2                      | Xinzhou   | 112.12  | 38.07  |
| 3                      | Nanjing   | 118.749 | 32.057 |
| 4                      | Wuhan     | 114.284 | 30.62  |

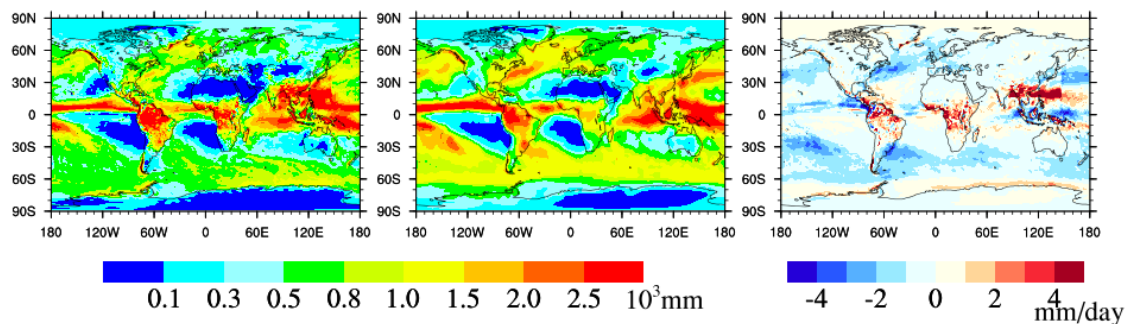

5 Fig. S1 Annual mean precipitation of WRF compared with GPCP data. The left column is WRF simulation (unit: mm), the middle column is GPCP reanalysis data (unit: mm), the right column is the difference between simulation and reanalysis (WRF-GPCP) (unit:  $\text{mm day}^{-1}$ ).

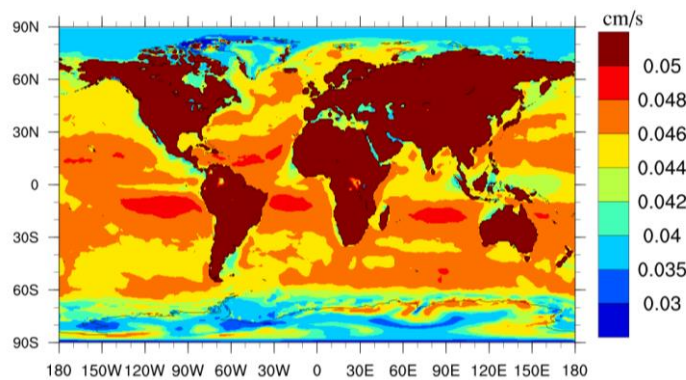

10 Fig. S2 Annual mean dry deposition velocity of ozone in IAP-AACM. The unit is  $\text{cm s}^{-1}$ .

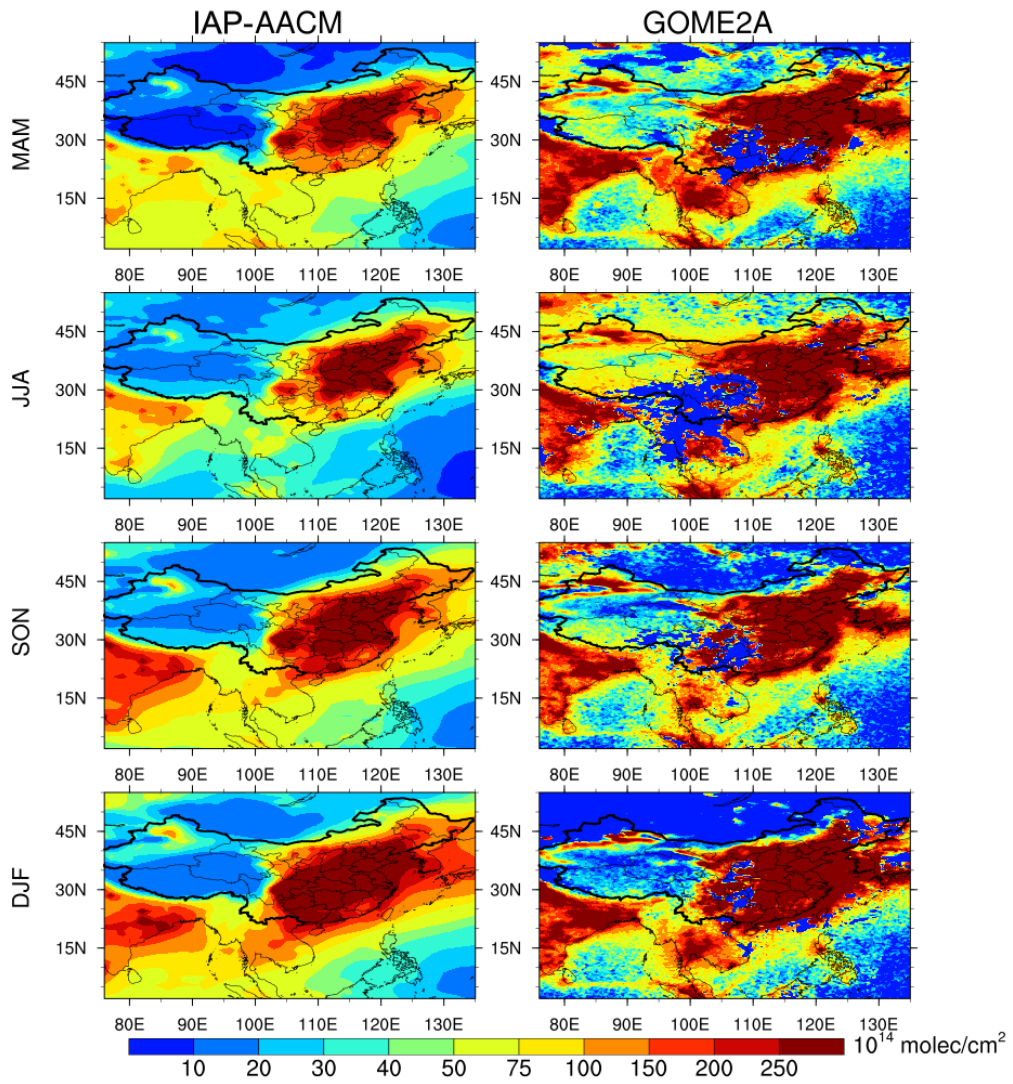

Fig. S3 Seasonal column concentration ( $10^{14}$  molecule  $\text{cm}^{-2}$ ) of NO<sub>2</sub> in IAP-AACM and GOME-2A in China.
